## RESEARCH ARTICLE

# Socioeconomic driving forces behind air polluting emissions in Mexico

Mayra Vega-Campa<sup>1</sup>, Francisco J. André<sup>2,3</sup>, Mario Soliño<sup>4\*</sup>

**1** Complutense University of Madrid, Madrid, Spain, **2** Department of Economic Analysis, Faculty of Economics, Complutense University of Madrid, Pozuelo de Alarcón, Madrid, Spain, **3** Complutense Institute for International Studies (ICEI), Finca Mas Ferré, Pozuelo de Alarcón, Madrid, Spain, **4** Institute of Marine Research—CSIC, Vigo, Spain

\* [msolino@iim.csic.es](mailto:msolino@iim.csic.es)

## Abstract

Air pollution is one of the most severe environmental problems that Mexico is currently facing. The objective of this paper is to quantify the most relevant socioeconomic driving forces behind air polluting emissions and, more specifically, 7 local pollutants in Mexico. We do so in a multilevel version of the Stochastic Impacts by Regression on Population, Affluence and Technology (STIRPAT) model that accounts for the spatial heterogeneity at the municipal level across the country. The results show that the most relevant variables to determine the emissions of atmospheric pollutants are the population, the harvested area and the number of cars, while technological development helps to mitigate such emissions. The ecological elasticities are, in all cases, smaller than one. Our purpose is to provide quantitative information about these socioeconomic driving forces of air deterioration as a basis to establish some recommendations for environmental policy decision-making.

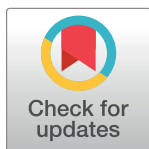

## OPEN ACCESS

**Citation:** Vega-Campa M, André FJ, Soliño M (2023) Socioeconomic driving forces behind air polluting emissions in Mexico. PLoS ONE 18(10): e0292752. <https://doi.org/10.1371/journal.pone.0292752>

**Editor:** Muhammad Khalid Bashir, University of Agriculture Faisalabad, PAKISTAN

**Received:** June 22, 2023

**Accepted:** September 27, 2023

**Published:** October 12, 2023

**Copyright:** © 2023 Vega-Campa et al. This is an open access article distributed under the terms of the [Creative Commons Attribution License](https://creativecommons.org/licenses/by/4.0/), which permits unrestricted use, distribution, and reproduction in any medium, provided the original author and source are credited.

**Data Availability Statement:** All the data is available in official statistics repositories. All the references to the data are included in the paper.

**Funding:** The authors received no specific funding for this work.

**Competing interests:** The authors have declared that no competing interests exist.

## 1. Introduction

Air pollution is one of the greatest environmental risks to human health and ecosystems. Human activity generates large amounts of atmospheric pollutants, with negative effects at global and local scales. As it has been widely documented by the IPCC reports, greenhouse gases (GHGs) contribute to overheating the planet and, consequently, have important effects on a global scale. Fighting climate change has become, not only a long-term, but even a short-term challenge, since future scenarios predict unstoppable global warming if we do not immediately act. Carbon neutrality is one the challenges to the next decades, especially in some parts of the world [1]. Although the original objectives of mitigation policies for climate change and air pollution are not related, the reduction of CO<sub>2</sub> emissions has benefits on the local air pollution mitigation, and vice versa [2–4].

Therefore, along with global environmental problems such as climate change, there are other pollutants whose effects are mostly regional and local and also have significant negative effects on the well-being of society [5–7]. To a large extent, global and local polluting share common causes, such as the burning of fossil fuels (coal, oil and gas), mainly in the industrial processes, heating and road transport.

According to the World Health Organization [8], it is estimated that seven million people die each year from exposure to the fine particles contained in polluted air. These particles penetrate deep into the lungs and the cardiovascular system and cause diseases such as strokes, heart disease, lung cancer, chronic obstructive pneumopathy and respiratory infections, such as pneumonia.

While air pollution is a global problem, the poorest and developing nations bear the brunt as they tend to have weaker economies, less developed health and social systems and are thus less endowed to face the consequences. This article focuses on the case of Mexico, where poor air quality is seen as a paramount issue of concern, not only because air emissions contribute to global problems such as climate change, but also, for their domestic and local implications. As we explain below, we place the emphasis on the latter but addressing local rather than global pollutants.

The purpose of the study is twofold: (i) to identify and quantify the main socioeconomic driving forces of air deterioration in Mexico considering the spatial heterogeneity across the country, and (ii) to provide recommendations for environmental policy decision-making based on the quantitative results. For that, we use the Stochastic Impacts by Regression on Population, Affluence and Technology (STIRPAT) model [9–11]. In previous applications of the STIRPAT model, geographical heterogeneity along a specific country has not been considered. Therefore, our study contributes to the previous literature about the socioeconomic driving forces of air pollution in several ways. First, this study incorporates the geographical heterogeneity of emissions, using municipal rather than country-level data. Secondly, and consistent with this approach, we focus on local air pollutants rather than greenhouse effect gases. The pollutants most commonly addressed in the related literature are CO<sub>2</sub> emissions (e.g. in Mexico, [12, 13]). From an econometric point of view, we use a multilevel model in order to exploit the structure of our data, which is nested in a two-level administrative structure because all the municipalities are grouped in a reduced number of regions or states.

This research is important to sustainability, carbon neutrality, local economy, environment, social development, etc. The paper is organized as follows. Section 2 provides a review of the analytical framework and the related literature; Section 3 presents the methodology and the data used in the study and Section 4 shows the results of the study. The fifth and last section provide the main conclusions and some policy suggestions.

## 2. Material and methods

### 2.1. Air pollution and human health in Mexico

The present study departs from most of the existing studies by focusing on 7 local air pollutants: suspended particles less than 10 micrometers (PM<sub>10</sub>), suspended particles less than 2.5 micrometers (PM<sub>2.5</sub>), sulfur dioxide (SO<sub>2</sub>), carbon monoxide (CO), nitrogen oxides (NO<sub>x</sub>), volatile organic compounds (COV), and ammonia (NH<sub>3</sub>). These pollutants have in common that they are an important source of respiratory diseases, reduce visibility, contribute to acid rain formation and are precursors of smog and ozone.

One of the collateral effects of the development of both, global and local emissions mitigation policies, is the improvement of human health [4]. In fact, the most obvious dimension of the impact of air pollution, and the one that has been more widely studied in Mexico is the one related to human health [14–18]. It has been widely reported that atmospheric pollution can cause many diseases, especially respiratory ones. Exposure to air pollutants can cause coughing, respiratory tract irritation or decreased lung function, trigger asthma-like reactions, aggravate a previous asthma condition and increase cancer cases [19]. For example, according to the Global Burden of Disease [20], chronic exposure to PM<sub>2.5</sub> has resulted in 7,600 premature

deaths per year in Mexico, and recent evidence also reports that exposure to PM<sub>2.5</sub> could increase the likelihood of COVID-19 death [14].

Air pollution also represents a serious economic problem due its associated costs, including the private expenses that people affected by various diseases must pay in medicines and medical consultations, as well as the consequences of decreasing their work or school productivity. In addition, the social costs of premature death materialize, on the one hand, in the loss of the contributions that these people could make to society and, on the other hand, in the psychological and emotional costs inflicted on family and friends. The increase in morbidity also provokes a loss of competitiveness due to absenteeism and the reduction in the hours dedicated to productive activities. Finally, the public resources, both human and material, used to care for people affected by air pollution can be interpreted as an opportunity cost, as such resources cannot be used to meet the other needs of the health sector [21].

## 2.2. Conceptual framework: The STIRPAT model

The IPAT identity, developed by [22], states that environmental impact can be split in three factors: the population size, the level of economic activity or per capita income and the polluting intensity of economic activity. The latter is fundamentally determined by the sectoral structure of the economy and the current production technology. In formal terms, this approach disaggregates environmental impact (I) as the product of the population size (P), wealth (A) and technology (T), i.e.:

$$I = P \times A \times T \quad (1)$$

[9, 10] resumed this idea and proposed a stochastic version of the IPAT identity in order to analyze the impact of the population, wealth and technology on the CO<sub>2</sub> emissions of 111 countries. In their approach the technological variable is modeled as a residual, i.e., as a non-observable term that encompasses all those factors that affect environmental impact and are neither population nor per capita economic activity. Subsequently, [23] revisited the IPAT identity and renamed the result as ImpACT. In the new version, the technology variable is not included in the error term, but is disaggregated in consumption per unit of product (C) and impact per unit of consumption (T), as follows:

$$I = P \times A \times C \times T \quad (2)$$

Based on the IPAT identity and the ImpACT model, [11] proposed a new model called STIRPAT. They pointed out that the previous approaches had a mere accounting nature, did not allow for hypothesis testing and assumed a linear specification. To overcome these limitations, STIRPAT is proposed as a non-linear stochastic model and incorporates the concept of ecological elasticity to measure the sensitivity of environmental impact to the anthropogenic forces included in the model. This approach also accounts for the technological variable T, which is assumed to represent all the factors that have an impact on environmental deterioration, other than population and per capita income. The STIRPAT model specification is:

$$I_i = aP_i^b A_i^c T_i^d e_i \quad (3)$$

where  $I$ ,  $P$ ,  $A$  and  $T$  have the same interpretation as in the IPAT identity and  $e_i$  is an error term. Subindex “ $i$ ” refers to the different units (countries, regions, cities,) considered in the model. The parameters of the model are  $a$ ,  $b$ ,  $c$ ,  $d$ , where  $a$  is a scale term and  $b$ ,  $c$ ,  $d$  are the ecological elasticities of environmental impact with respect to population, production and technology, respectively, which allow for inferences about the precise weight of this variables on environmental impact [11]. Thus, the STIRPAT model can be seen as a generalization of the

IPAT identity or, in other words, the IPAT identity can be seen as a deterministic, particular case of the STIRPAT model with  $a = b = c = d = 1$ .

Applying natural logarithm on both sides of Eq (3) we get:

$$\ln I_i = a_0 + b \ln(P_i) + c \ln(A_i) + d \ln(T_i) + u_i \tag{4}$$

where  $a_0 = \ln a$  and  $u_i = \ln e_i$ .

Technological innovation and digital economy contribute to reduce emissions and achieve green development goals [24, 25]. The technological variable  $T$  can be disaggregated by including different factors that theoretically influence the environmental impact. Different variables have been used in the literature to proxy this variable. These include, among others, the energy efficiency or intensity [12, 13, 26–34], the economic weight of the industrial sector [11, 13, 26–28, 30, 33, 35–37], the share of the service sector in the GDP [13, 30, 36, 38], the level of trade openness [32], and the climatic conditions [11, 32].

### 2.3. The data

Our database includes data at the municipal level (2457 observations) for Mexico, which are grouped into 32 states. For the estimation of the models, we omitted incomplete observations (289), and ended up with 2168 effective observations. Table 1 shows the name of the variables, the code used for modelling using the statistical package STATA®, the units of measurement, data source, and descriptive statistics.

As for the explanatory variables, as usual in this type of models, we include population (POP), a measure of economic activity and three variables to catch the technological components.

Table 1. Variables of the model.

| Variable                                                    | Code              | Unit of measurement                                        | Data source                               | Obs. | Mean   | Min.   | Max.     | Std. dev. |
|-------------------------------------------------------------|-------------------|------------------------------------------------------------|-------------------------------------------|------|--------|--------|----------|-----------|
| <b>Independent Variables</b>                                |                   |                                                            |                                           |      |        |        |          |           |
| Population                                                  | POP               | Number of people                                           | State and Municipal Database System-INEGI | 2457 | 48649  | 87     | 1827868  | 139060    |
| Gross Production per capita                                 | GPPC              | Thousands of pesos per capita                              | State and Municipal Database System-INEGI | 2457 | 43.50  | 0.027  | 9488.64  | 283.151   |
| Households with access to computers and internet per capita | HCI               | percentage                                                 | 2015-INEGI Intercensal Survey             | 2298 | 0.024  | <0.01  | 0.288    | 0.028     |
| Harvested area                                              | HA                | Hectares                                                   | Agri-food and consultation system         | 2432 | 8513   | 6      | 227773   | 15557     |
| Transport                                                   | TR                | Number of cars (cargo and public) per thousand inhabitants | State and Municipal Database System-INEGI | 2352 | 95.396 | <0.01  | 1321.962 | 91.027    |
| <b>Dependent Variables</b>                                  |                   |                                                            |                                           |      |        |        |          |           |
| Sulphur dioxide                                             | SO <sub>2</sub>   | Tons                                                       | National Emissions Inventory-SEMARNAT     | 2457 | 681    | 0.024  | 197,133  | 7,792     |
| Carbon monoxide                                             | CO                | Tons                                                       | National Emissions Inventory-SEMARNAT     | 2457 | 3,123  | 11.318 | 98,635   | 7,335     |
| Nitrogen oxides.                                            | NO <sub>x</sub>   | Tons                                                       | National Emissions Inventory-SEMARNAT     | 2457 | 1,569  | 7.862  | 58,746   | 3,785     |
| Volatile organic components                                 | COV               | Tons                                                       | National Emissions Inventory-SEMARNAT     | 2457 | 5,805  | 19.970 | 493,707  | 18,099    |
| Suspended particles less than 2.5 m                         | PM <sub>2.5</sub> | Tons                                                       | National Emissions Inventory-SEMARNAT     | 2457 | 309    | 1.085  | 19,445   | 702       |
| Suspended particles less than 10 mm                         | PM <sub>10</sub>  | Tons                                                       | National Emissions Inventory-SEMARNAT     | 2457 | 409    | 1.555  | 21,856   | 930       |
| Ammonia                                                     | NH <sub>3</sub>   | Tons                                                       | National Emissions Inventory-SEMARNAT     | 2457 | 338    | 1.018  | 5,699    | 534       |

<https://doi.org/10.1371/journal.pone.0292752.t001>

Economic activity is represented by variable GPPC (Gross Production Per Capita), which corresponds to overall production of all economic activities in the country divided by the number of inhabitants. This variable was used as a proxy for Gross Domestic Product (GDP) because no data of the latter are available at the municipal level. In addition, GPPC and GDP are highly correlated (98.8%) and thus provide essentially the same information in statistical terms.

The proxy variables for technology have been selected based on data availability and the relation to polluting activities. The available variable that is conceptually more related to technology in the usual sense is the number of households with access to computers and the internet (HCI). These variable forms part of the Technological Achievement Index proposed by the United Nations Development Program [39], which assesses the capacity to create technology as well as the human capacity to adapt to the New Knowledge Society.

The two other variables play basically a role of control variables. The second one is the harvested area (HA), which is included to capture the polluting impact of the agricultural sector, since there is strong evidence that this sector has a significant impact on air pollution. Specifically, agricultural practices are mainly related to the emission of NO<sub>x</sub>, PM<sub>10</sub>, PM<sub>2.5</sub>, NH<sub>3</sub> and COV [40]. Finally, we also include the per capita number of cargo and public transport vehicles (TR), because vehicles are an important source of emissions from air pollutants. Some studies analyzed the effectiveness of public policies aimed at reducing emissions, such as the restrictions to use of vehicles (see, e.g., [41, 42]). Private transport is not included in the model because it shows multicollinearity with the population variable.

The explained variables (POL) are the municipal emissions of seven pollutants: PM<sub>10</sub>, PM<sub>2.5</sub>, SO<sub>2</sub>, CO, NO<sub>x</sub>, COV and NH<sub>3</sub>. Fig 1 (maps 1 to 7) represent total emissions per municipality. It is worth noting that in the southern state of Oaxaca emissions of all pollutants are clearly lower than average, but for the rest of the states, the distribution of pollutants is quite heterogeneous.

The data correspond to 2013, which is the most recent year in which the relevant data are available at the municipal level. For variables whose data were not available for 2013 at the municipal level, we took the closest year available. Thus, the population variable refers to the number of inhabitants per municipality in 2010 and the number of households with access to computers and the internet refers to 2015.

### 2.3. Econometric approach. The multilevel model

Different econometric approaches have been used to estimate the STIRPAT model. These include Ordinary Least Squares [11], Generalized Least Squares [38], Robust Minimum Squares [43], Partial Least Squares [12, 44], Fixed Effects Models [29, 45], among others.

We employ a multilevel model in order to exploit the structure of our database. Multilevel models, also called hierarchical models, are specifically designed to deal with nested or hierarchically structured data [46]. In our case study there is a hierarchical structure in the sense that municipalities are nested in states. We specify seven versions (one for each pollutant under analysis) of a same multilevel model for the Mexican municipalities.

In a multilevel model there are two types of parameters: fixed (intercepts and elasticities) and random parameters (variances and covariance matrix). In each of the seven versions of our model, there are two levels. Level 1 expresses the dependent variable (amount of emissions) for observation  $i$  (municipality) within unit  $j$  (state) as:

$$LPOL_{ij} = \beta_{0j} + \beta_{1j}LPOP_{ij} + \beta_{2j}LGPPC_{ij} + \beta_{3j}LHCI_{ij} + \beta_{4j}LHA_{ij} + \beta_{5j}LTR_{ij} + \varepsilon_{ij} \quad (5)$$

$$\text{where } \varepsilon_{ij} \sim N(0, \sigma_{\varepsilon}^2)$$

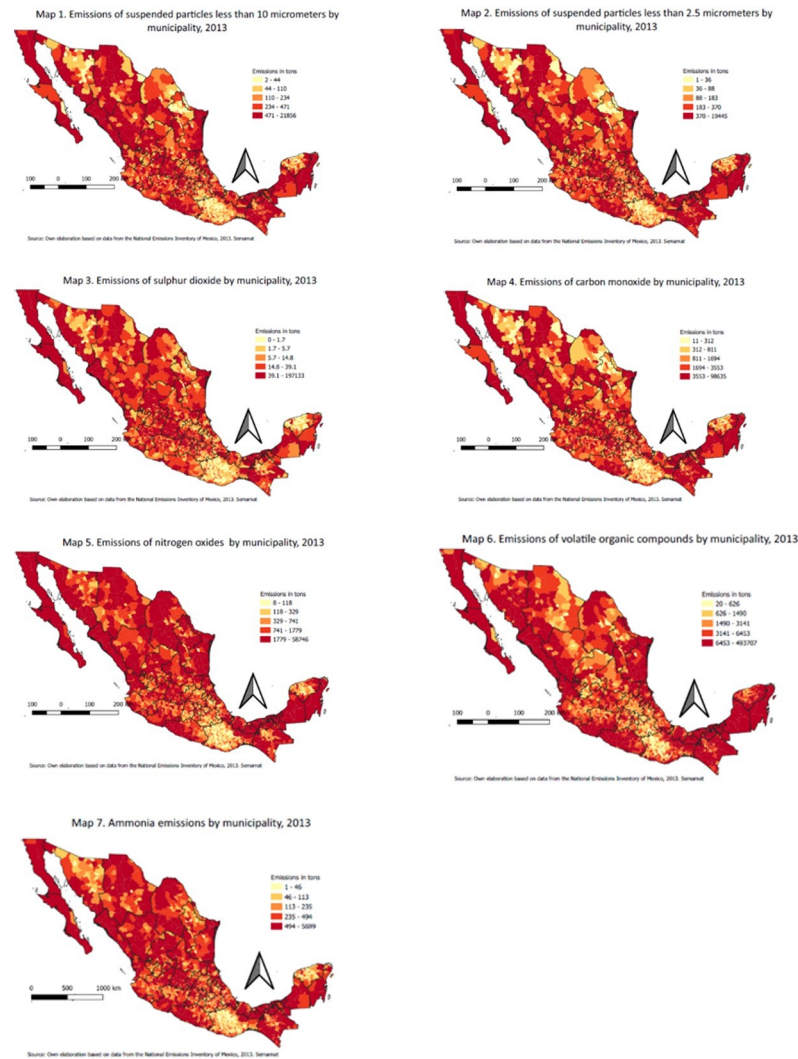

**Fig 1. Emissions of air pollutants in Mexico.**

<https://doi.org/10.1371/journal.pone.0292752.g001>

where  $LPOL$  is the natural logarithm of the volume of emissions (for every pollutant). Level 1 coefficients  $\beta_{0j} \dots \beta_{5j}$  represent the scale term ( $\beta_{0j}$ ) and the elasticities ( $\beta_{1j} \dots \beta_{5j}$ ) with respect to the explanatory variables and  $LPOP$ ,  $LGPPC$ ,  $LHCI$ ,  $LHA$ , and  $LTR$  represent the logarithm of the explanatory variables. Finally,  $\varepsilon_{ij}$  is the random term of level 1, which is assumed to have a normal distribution with zero mean.

In the second level of the model, each of the coefficients  $\beta_{0j} \dots \beta_{5j}$  defined in level 1 are expressed as random variables, with a common term for all states and a stochastic term that varies across states:

$$\beta_{hij} = \beta_h + \mu_{hij} \text{ with } h = 0, 1, \dots, 5 \tag{6}$$

For example, according to Eq (6), the level 1 coefficient  $\beta_{0j}$ , which is the scale coefficient, can be expressed as the aggregation of two components. The first one is the systematic part,  $\beta_0$ , which measures the average emissions of states when the explanatory variables are omitted. The second part,  $\mu_{0j}$ , represents the random differential component of the  $j^{\text{th}}$  state's emissions



with respect to the average value of all states. Similarly, the elasticity with respect to the population  $\beta_{1j}$ , can be split into the average elasticity of all the states,  $\beta_1$ , and the differential part of state  $j$ , which is the random tem  $\mu_{1j}$ . The same interpretation applies to the rest of coefficients.

By inserting Eq (6) into (5), we can rewrite the whole model as:

$$LPO_{ij} = \beta_0 + \mu_{0j} + (\beta_1 + \mu_{1j})LPO_{ij} + (\beta_2 + \mu_{2j})LGPPC_{ij} + (\beta_3 + \mu_{3j})LHCl_{ij} + (\beta_4 + \mu_{4j})LHA_{ij} + (\beta_5 + \mu_{5j})LTR_{ij} + \epsilon_{ij} \tag{7}$$

where  $\beta_0$  represents the average emissions of all the states,  $\beta_1 \dots \beta_5$  is the average elasticity of emissions with respect to the corresponding explanatory variable ( $LPO_{ij}, \dots, LTR$ ),  $\mu_{0j}$  is the idiosyncratic term of the  $j$ -th state in terms of scale,  $\mu_{1j} \dots \mu_{5j}$  are the idiosyncratic effects of the  $j$ -th state in terms of the corresponding elasticities and  $\epsilon_{ij}$  is the level-1 error term.

### 3. Results

Eq (7) is estimated for each of the pollutants under study, with the purpose of determining the influence of the considered variables on the amount of emissions per municipality for every pollutant. The results are shown in Table 2. The estimations are carried out by maximum likelihood using STATA® software, and robustness analyses were performed to test the effects of

**Table 2. Multilevel model results.**

| Average coefficients (Standard errors in parentheses)                      |                      |                      |                      |                     |                     |                     |                      |
|----------------------------------------------------------------------------|----------------------|----------------------|----------------------|---------------------|---------------------|---------------------|----------------------|
|                                                                            | PM <sub>10</sub>     | PM <sub>2.5</sub>    | SO <sub>2</sub>      | CO                  | NO <sub>x</sub>     | COV                 | NH <sub>3</sub>      |
| POP                                                                        | 0.553***<br>(0.026)  | 0.609***<br>(0.023)  | 0.857***<br>(0.025)  | 0.829***<br>(0.016) | 0.611***<br>(0.022) | 0.572***<br>(0.03)  | 0.535***<br>(0.022)  |
| GPPC                                                                       | 0.036*<br>(0.016)    | 0.027<br>(0.014)     | 0.263***<br>(0.034)  | -0.016<br>(0.009)   | 0.078***<br>(0.014) | 0.025<br>(0.02)     | 0.008<br>(0.012)     |
| HCl                                                                        | -0.168***<br>(0.021) | -0.198***<br>(0.024) | -0.032<br>(0.03)     | -0.138*** (0.021)   | -0.093**<br>(0.028) | -0.291*** (0.04)    | -0.143*** (0.023)    |
| HA                                                                         | 0.357*** (0.029)     | 0.308*** (0.027)     | 0.161*** (0.021)     | 0.125*** (0.019)    | 0.241*** (0.023)    | 0.216*** (0.03)     | 0.308*** (0.024)     |
| TR                                                                         | 0.029<br>(0.028)     | 0.024<br>(0.034)     | 0.438***<br>(0.038)  | 0.222***<br>(0.042) | 0.342***<br>(0.033) | 0.01<br>(0.051)     | 0.156***<br>(0.032)  |
| Constant                                                                   | -3.889*** (0.274)    | -4.386*** (0.291)    | -9.501***<br>(0.371) | -3.282*** (0.287)   | -3.235***<br>(0.32) | -0.605<br>(0.424)   | -3.693***<br>(0.241) |
| Typical deviations from random parameters (Standard errors in parentheses) |                      |                      |                      |                     |                     |                     |                      |
| POP                                                                        | 0.010**<br>(0.004)   | 0.007**<br>(0.003)   | <0.01<br>(<0.01)     | 0.002*<br>(0.001)   | 0.005**<br>(0.002)  | 0.013**<br>(0.005)  | 0.007**<br>(0.003)   |
| GDP                                                                        | 0.002<br>(0.001)     | 0.001<br>(0.001)     | 0.018*<br>(0.008)    | <0.01<br>(<0.01)    | 0.001<br>(0.002)    | 0.004<br>(0.002)    | <0.01***<br>(0.001)  |
| HA                                                                         | 0.017**<br>(0.006)   | 0.014**<br>(0.005)   | 0.001<br>(0.001)     | 0.007**<br>(0.003)  | 0.009**<br>(0.003)  | 0.016**<br>(0.006)  | 0.011**<br>(0.004)   |
| HA                                                                         | 0.002<br>(0.003)     | 0.005<br>(0.003)     | 0.002<br>(0.003)     | 0.005*<br>(0.002)   | 0.009*<br>(0.004)   | 0.026*<br>(0.011)   | 0.006*<br>(0.002)    |
| TR                                                                         | 0.003<br>(0.004)     | 0.008<br>(0.006)     | <0.01<br>(<0.01)     | 0.028<br>(0.011)    | 0.007<br>(0.004)    | 0.033<br>(0.015)    | 0.009<br>(0.004)     |
| var(Constant)                                                              | 0.379*<br>(0.247)    | 0.516*<br>(0.306)    | 0.072<br>(0.080)     | 1.032<br>(0.392)    | 0.901**<br>(0.383)  | 2.041**<br>(0.823)  | 0.220*<br>(0.192)    |
| var(Residual)                                                              | 0.321***<br>(0.010)  | 0.311***<br>(0.010)  | 0.999***<br>(0.031)  | 0.169***<br>(0.006) | 0.313***<br>(0.010) | 0.387***<br>(0.012) | 0.253***<br>(0.008)  |

\* p<0.10  
 \*\* p<0.05  
 \*\*\* p<0.001

<https://doi.org/10.1371/journal.pone.0292752.t002>

several specifications for the random parameters. As expected, some differences were found depending on the statistical assumptions, but the internal validity of results remained for all the specifications. The obtained values of Akaike Information Criterion decrease significantly in the completely random model, which implies a better adjustment of the completely random model as compared to the null model. The “average coefficients” displayed on [Table 2](#) are interpreted as the corresponding ecological elasticities (EE) associated to each independent variable.

The existing heterogeneity in emissions in municipalities can be also observed in the [Table 2](#). Specifically, we can observe how the standard deviations of the random parameters are statistically significant at 90% level for different explanatory variables and different pollutants. This is an indicator of existing spatial heterogeneity and the adequacy of using a multi-level model. However, obtaining individual recommendations (i.e. by municipality) is something that escapes our analysis. Combining information technology and social science is an emerging research trend [47]. For this, a specific analysis should be carried out using geostatistical methods and air quality models [48], which goes beyond the objectives of this article.

In all the estimated models, the ecological elasticity of population is found to be significant, positive, and larger than the coefficients associated to the other explanatory variables. This result suggests that population is the most relevant factor for the considered pollutants in quantitative terms. Nevertheless, the ecological elasticity of population is always smaller than one, which means that the effect of an increase in population on polluting emissions is less than proportional. Across pollutants, the highest population elasticities are those corresponding to SO<sub>2</sub> (0.857) and CO (0.829), which means that these pollutants are particularly sensitive to the population size. For the rest of pollutants, the corresponding elasticity is between 0.535 and 0.611.

The role of per capita production turns to be much weaker than that of population. The estimated values are well below one and, actually, they are always below 0.1 except for SO<sub>2</sub>, which is 0.263, meaning that a 1% increase of per capita output will result in an average increase of 0.263% of SO<sub>2</sub> emissions. Apart from SO<sub>2</sub>, in statistical terms, the estimated elasticity of this variable is significant only for PM<sub>10</sub>, and NO<sub>x</sub> emissions.

The ecological elasticity of the proxy for technology, i.e., the proportion of households with a computer and access to the internet, is negative in all cases except for SO<sub>2</sub>, where it is not statistically significant at 90% level. The highest value of this parameter is found for COV with an ecological elasticity equal to 0.216. This result is consistent with the belief that technological progress can contribute to decrease environmental deterioration.

The variable related to the agricultural harvested surface area was found to be statistically significant and positive for all the pollutants, with values ranging from 0.125 (CO) to 0.357 (PM<sub>10</sub>). It means that pollutant emissions are increasing, but not very strongly, in the harvested area. These results are consistent with the fact that agriculture is mainly related to emissions of particulate matter, NH<sub>3</sub> and NO<sub>x</sub>.

As expected, the relative number of cargo and public transport vehicles has a positive effect on some pollutants, notably SO<sub>2</sub> (with an elasticity equal to 0.438), NO<sub>x</sub> (0.342) and, to a lesser extent, CO (0.222) and NH<sub>3</sub> (0.156). On the other hand, the effect of this variable is insignificant in statistical terms to explain the difference across municipalities of the emissions of PM<sub>10</sub>, PM<sub>2.5</sub>, and COV. To some extent, this result may be linked to the omission of private transport from our analysis due to absence of data.

## 4. Discussion

In general terms, the studies based on the STIRPAT model conclude that energy intensity is positively linked (or, conversely, energy efficiency is negatively linked) to polluting emissions



or environmental deterioration. The weight of the industrial sector is also typically found to have a positive impact on pollution, with an elasticity that varies between 0.3 and 1, whereas a larger share of the service sector on GDP is commonly associated with a lower environmental impact.

Most applications of the STIRPAT model also conclude that population and per capita economic activity have a positive effect on environmental deterioration with an observed ecological elasticity equal or close to one. [12] concluded that in middle-high income countries, where Mexico is classified, the ecological elasticity for population and income is positive but smaller than one. On the other hand, [13] concluded that for middle-income countries the population elasticity is between 1.231 and 1.907, while income elasticity ranges from 0.467 to 1.011. At the regional level, [43] estimated a cross-sectional data model for the Southeastern United States and found out that the elasticity of CO<sub>2</sub> emissions with respect to population is not different from one while the results with respect to income are mixed. In a study for 20 emerging countries, including Mexico, [45] found an elasticity of 0.786 for the population and 1.121 for income.

Our empirical results about the impact of population on pollution is in line with previous studies, such as [12], who carried out an analysis in which countries are ranked by income and Mexico is considered within the medium-high income group. [45] also find a coefficient less than 1. On the other hand, in a study where Mexico is ranked as a middle-income country, [13] find coefficients above 1. In a state-level study for the USA in 2010, [49] found similar estimated elasticities than ours for CO, SO<sub>2</sub> and PM<sub>10</sub>. Similar conclusions are also found in other studies that consider developed and developing countries together, such as [11, 28, 30, 38]. In regard to the role of the income, our results are consistent with the findings of [12], who find coefficients for the income variable with respect to CO<sub>2</sub> and N<sub>2</sub>O emissions less than 1. In contrast, [45] find a coefficient greater than 1 for this variable. Finally, our empirical results suggest that ecological elasticity of technology can be related with the Environmental Kuznets Curve hypothesis. [50] proposed to apply the seminal study by [51], who found an inverted-U relationship between economic growth and inequality, to the relationship between economic growth and environmental degradation [52]. According to this hypothesis, in a first phase of growth there is an increase in pollution levels, up to a certain moment in which a turning point is reached and, further increases in income are associated with a decrease in pollution. If this framework is taken as valid, our results about the effect of technology can be understood as corresponding to the decreasing part of an Environmental Kuznets Curve.

## 5. Conclusions

Air pollution and its external effects is currently one of the main axes of debates in the public sphere and the policy arena. Since the Industrial Revolution, the use of fossil fuels and the increasing demand of energy have generated a global map of strong environmental degradation, with an increase in pollutant emissions that endangers ecosystems and human well-being. This is true worldwide but, especially, in developing countries. Air pollution is a serious problem in Mexico due to several socioeconomic causes, mainly through the negative effects on health and wellbeing. The emissions of local air pollutants analyzed in this study can cause, from a simple cough, to some cancers. In addition, these pollutants reduce visibility, contribute to the formation of acid rain and are precursors of smog and ozone. To shed some light on this problem, we have applied a bi-level version of the STIRPAT model to identify the main causes of air deterioration in Mexico along available data at municipal level for a set of socioeconomic variables representing the different dimensions of the model: population, per capita income, technology, harvested area and the number of cargo and public transport vehicles. Unlike

most previous applications of the STIRPAT model, we have focused on local pollutants and used data at the municipal level. Using a multilevel model allows to capture the variability that exists between municipalities belonging to a state and municipalities that share characteristics of another state.

Population is found to be clearly the variable that has the greatest impact on the emissions of the 7 pollutants analyzed, followed by the agricultural harvested area. Per capita production was not significant for all models and the ecological elasticity always had a clearly lower value than one, which can be interpreted as a refutation of the traditional IPAT identity, where the elasticities are assumed to be equal to one. Our measure of technological development has a negative sign when statistically significant, which suggests that more technological advance municipalities tend, *ceteris paribus*, to pollute less. Finally, cargo and public transport vehicles turn out to be relevant for some pollutants, but not for all. Although population is the variable with a greater ecological elasticity, it is perhaps the one over which it is more difficult to act from a political point of view, at least in the short and the medium term. It seems more feasible to address the rest of the relevant variables to improve air quality in Mexico.

Finally, we highlight the two main limitation of this study. The first one refers to lack of updated local data. The database corresponds to 2013, which is the more recent year in which the relevant data are available at the municipal level. The second one is related to the analysis of territorial data. The STIRPAT model presents a structure defined from the economic theory. However, there are other analysis tools that would make it possible to delve into territorial differences. Mexico is not a single unit, since, as in other countries, there are areas where pollution problems are completely different, with contrast between big cities such as Mexico City, Guadalajara, or Monterrey, and cities with less socio-economic development, such as Pachuca, Querétaro, Chilpancingo, among others. New geospatial analyses can be a good complement to the STIRPAT model, providing specific territorial information for which this model is not intended.

## 6. Policymaking suggestions

Coping with the reduction of air quality and mitigating its negative effects on well-being represents a crucial challenge for national, local and regional policymakers. In order to launch effective policies and programs, it is crucial to have a good picture of the problem and, thus, a particularly relevant question is the identification and assessment of the main factors that determine the volume of polluting emissions. We did so by carrying out an analysis based on the STIRPAT model.

The fact that technological development seems relevant to mitigate environmental deterioration, together with the relevant impact of the agricultural harvested area, and the number of vehicles, suggest that an effort to improve agricultural practices and have a more efficient public transport and cargo system through technological improvements, could result in a significant improvement in air quality, life and health in Mexico. Obviously, this is a general recommendation that should be adapted to the territorial particularities and geographical restrictions. In this sense, the development of specific measures favoring the more rural territories could contribute to correct the negative externalities that urban pollutants caused on the rural environments [53]. This information can help policy-makers to improve public programs oriented to improve air quality, which is one of the challenges for the next years in Mexico and in the whole world.

## Author Contributions

**Conceptualization:** Mario Soliño.

**Data curation:** Mayra Vega-Campa.

**Formal analysis:** Mayra Vega-Campa.

**Investigation:** Mayra Vega-Campa, Francisco J. André, Mario Soliño.

**Methodology:** Mayra Vega-Campa, Mario Soliño.

**Project administration:** Francisco J. André, Mario Soliño.

**Software:** Mayra Vega-Campa.

**Supervision:** Francisco J. André, Mario Soliño.

**Writing – original draft:** Mayra Vega-Campa, Francisco J. André, Mario Soliño.

**Writing – review & editing:** Francisco J. André, Mario Soliño.

## References

1. Yu X., Dong Z., Zheng D. (2023). Research on Critical Peak Price Decision Optimization Considering Industrial Consumer's Risk Appetite under the Carbon Neutrality Goal. *Sustainability* 15: 9347.
2. Shi Q., Zheng B., Zheng Y., Tong D., Liu Y., Ma H., et al. (2022). Co-benefits of CO<sub>2</sub> emission reduction from China's clean air actions between 2013–2020. *Nature Communications* 13: 5061. <https://doi.org/10.1038/s41467-022-32656-8> PMID: 36030262
3. Tibrewal K., Venkataraman C. (2020). Climate co-benefits of air quality and clean energy policy in India. *Nature Sustainability* 4: 305–313.
4. Yang J., Zhao Y., Cao J., Nielsen C.P. (2021). Co-benefits of carbon and pollution control policies on air quality and health till 2030 in China. *Environment International* 152: 106482. <https://doi.org/10.1016/j.envint.2021.106482> PMID: 33706036
5. Rodríguez-Sánchez J. I. (2014). Do Mexicans care about air pollution? *Latin America Economic Review*, 8–24.
6. González F., Leipnik M., & Mazumder D. (2013). How much are urban residents in Mexico willing to pay for cleaner air? *Environment and Development Economics*, 354–379.
7. Ghosh S., & Molina D. (2002). Public Decisions for Private Management of Air Pollution: The Case of the U.S.-Mexico Border Region. *The Journal of Developing Areas*, 93–107.
8. WHO. (2018). World Health Organization. Retrieved from <https://www.who.int/es/news/item/02-05-2018-9-out-of-10-people-worldwide-breathe-polluted-air-but-more-countries-are-taking-action>
9. Dietz T., & Rosa E. (1994). Rethinking the Environmental Impacts of Population, Affluence and Technology. *Human Ecology Review* 1, 277–300.
10. Dietz T., & Rosa E. (1997). Effects of population and affluence on CO<sub>2</sub> emissions. *Protocol of the National Academy of Sciences USA* 94, 175–179.
11. York R., Rosa E. A., & Dietz T. (2003). STIRPAT, IPAT and ImPACT: analytic tools for unpacking the driving forces of environmental impacts. *Ecological Economics* 46, 351–365.
12. Fan Y., Liu L.-C., Wu G., & Wei Y.-M. (2006). Analyzing impact factors of CO<sub>2</sub> emissions using the STIRPAT model. *Environmental Impact Assessment Review* 26, 377–395.
13. Poumanyong P., & Kaneko S. (2010). Does urbanization lead to less energy use and lower CO<sub>2</sub> emissions? A cross-country analysis. *Ecological Economics* 70, 434–444.
14. López-Feldman A., Heres D., & Marquez-Padilla F. (2021). Air pollution exposure and COVID-19: A look at mortality in Mexico City using individual-level data. *Science of the Total Environment*, 1–9.
15. Stevens G. A., Dias R. H., & Ezzati M. (2008). The Effects of 3 Environmental Risks on Mortality Disparities across Mexican Communities. *Proceedings of the National Academy of Sciences of the United States of America*, 16860–16865. <https://doi.org/10.1073/pnas.0808927105> PMID: 18974224
16. Brauer M., Avila-Casado C., Fortoul T. I., Vedal S., Stevens B., & Churg A. (2001). Air Pollution and Retained Particles in the Lung. *Environmental Health Perspectives*, 1039–1043. <https://doi.org/10.1289/ehp.011091039> PMID: 11675269
17. Sánchez-Carrillo C. I., Cerón-Mireles P., Rojas-Martínez M. R., Mendoza-Alvarado L., Olaiz-Fernández G., & Borja-Aburto V. H. (2003). Surveillance of Acute Health Effects of Air Pollution in Mexico City. *Epidemiology*, 536–544. <https://doi.org/10.1097/01.ede.0000081801.90352.bf> PMID: 14501268

18. Mamkhezri J., Bohara A. K., & Islas Camargo A. (2020). Air pollution and daily mortality in the Mexico City Metropolitan Area. *Atmósfera*, 249–267.
19. SEMARNAT-INE (2005). Guide to the elaboration and uses of emissions inventories. Secretariat of the Environment and Natural Resources-National Institute of Ecology. Mexico: Mexico City.
20. SEDEMA (2018). Historical analysis of the health benefits of the population associated with air quality in Mexico City between 1990 and 2015. Secretariat of the Environment, Mexico: Mexico City.
21. Government of the State of Mexico, S.S. (2020). Program to improve the air quality of the Metropolitan Zone of the Valley of Mexico 2011–2020. Obtained from <http://www.aire.cdmx.gob.mx/>
22. Ehrlich P., & Holdren J. (1972). A bulletin dialogue on the 'closing circle': critique: one-dimensional ecology. *Bulletin of the Atomic Scientists* 28, 16–27.
23. Waggoner P.E., & Ausubel J.H. (2002). A framework for sustainability science: A renovated IPAT identity. *Proceedings of the National Academy of Sciences*, 99, 7860–7865. <https://doi.org/10.1073/pnas.122235999> PMID: 12060732
24. Geng Y., Zhu R., Maimaituerxun M. (2022). Bibliometric review of carbon neutrality with CiteSpace: evolution, trends, and framework. *Environmental Science and Pollution Research* 29: 76668–76686. <https://doi.org/10.1007/s11356-022-23283-3> PMID: 36169840
25. Geng Y., Chen L., Li J., Iqbal K. (2023a). Higher education and digital Economy: Analysis of their coupling coordination with the Yangtze River economic Belt in China as the example. *Ecological Indicators* 154: 110510.
26. Nasrollahi Z., Hashemi M. -s., Bameri S., & Taghvaei V. M. (2020). Environmental pollution, economic growth, population, industrialization, and technology in weak and strong sustainability: using STIRPAT model. *Environment, Development and Sustainability* 22, 1105–1122.
27. Lin S., Zhao D., & Marinova D. (2009). Analysis of the environmental impact of China based on STIRPAT model. *Environmental Impact Assessment Review* 29, 341–347.
28. Bargaoui S. A., Liouane N., & Nouri F. Z. (2014). Environmental Impact determinants: An empirical analysis based on the STIRPAT model. *Procedia—Social and Behavioral Sciences*, 449–458.
29. Wang Y., Zhang X., Kubota J., Zhu X., & Lu G. (2015). A semi-parametric panel data analysis on the urbanization-carbon emissions nexus for OECD countries. *Renewable and Sustainable Energy Reviews* 48, 704–709.
30. Chikaraishi M., Fujiwara A., Kaneko S., Poumanyong P., Komatsu S., & Kalugin A. (2015). The moderating effects of urbanization on carbon dioxide emissions: A latent class modeling approach. *Technological Forecasting & Social Change* 90, 302–317.
31. Hassan M. (2016). Urbanization and CO<sub>2</sub> emission in Bangladesh: The Application of STIRPAT model. 3rd International Integrative Research Conference on Development, Governance and Transformation. Comilla, Bangladesh.
32. Yang L., Xia H., Zhang X., & Yuan S. (2018). What matters for carbon emissions in regional sectors? A China study of extended STIRPAT model. *Journal of Cleaner Production* 180, 595–602.
33. Martínez-Zarzoso I., & Maroutti A. (2011). The impact of urbanization on CO<sub>2</sub> emissions: Evidence from developing countries. *Ecological Economics* 70, 1344–1353.
34. Su K., & Lee C-M. (2020). When will China achieve its carbon emission peak? A scenario analysis based on optimal control and the STIRPAT model. *Ecological Indicators* 112, 106138.
35. Sun L., Deng Y., Xin H., Xing T., & Tan Z. (2013). Multiple factors path-STIRPAT analysis model of Beijing CO<sub>2</sub> emission. *Applied Mechanics and Materials* 389, 166–171.
36. Salim R.A., & Shafiei S. (2014). Urbanization and renewable and non-renewable energy consumption in OECD countries: An empirical analysis. *Economic Modelling* 38, 581–591.
37. Yeh J.-C., & Liao C.-H. (2017). Impact of population and economic growth on carbon emissions in Taiwan using an analytic tool STIRPAT. *Sustainable Environment Research* 27, 41–48.
38. Shi A. (2003). The impact of population pressure on global carbon dioxide emissions, 1975/1996: evidence from pooled cross-country data. *Ecological Economics* 44, 29–42.
39. UNDP (2001). Human Development Report 2001: Making New Technologies Work for Human Development. United Nations Development Programme, Oxford University Press, New York.
40. INE-SEMARNAT (2009). Guide for estimating emissions from stationary sources. National Institute of Ecology-Secretariat of Environment and Natural Resources, Mexico: Mexico City.
41. Guerra E., & Millard-Ball A. (2017). Getting around a license-plate ban: Behavioral responses to Mexico City's driving restriction. *Transportation Research Part D* 55, 113–126.
42. Davis L. W. (2017). Saturday Driving Restrictions Fail to Improve Air Quality in Mexico City. *Scientific Reports*, 1–9.

43. Roberts T. (2011). Applying the STIRPAT model in a post-Fordist landscape: Can a traditional econometric model work at the local level? *Applied Geography* 31, 731–739.
44. Jia J., Deng H., Duan J., & Zhao J. (2009). Analysis of the major drivers of the ecological footprint using the STIRPAT model and the PLS method—A case study in Henan Province, China. *Ecological Economics* 68, 2818–2824.
45. Zhu H.-M., You W.-H., & Zeng Z.-f. (2012). Urbanization and CO<sub>2</sub> emissions: A semi-parametric panel data analysis. *Economics Letters* 117, 848–850.
46. Gelman A., & Hill J. (2007). *Data Analysis using Regression and Multilevel/Hierarchical Models*. Cambridge University Press.
47. Geng Y., Zhang N., Zhu R. (2023b). Research progress analysis of sustainable smart grid based on CiteSpace. *Energy Strategy Reviews* 48: 101111.
48. Li X., Bei N., Tie X., Wu J., Liu X., Wang Q., et al. (2021). Local and transboundary transport contributions to the wintertime particulate pollution in the Guanzhong Basin (GZB), China: A case study. *Science of the Total Environment* 797: 148876. <https://doi.org/10.1016/j.scitotenv.2021.148876> PMID: 34311358
49. Squalli J. (2010). An empirical assessment of U.S. state-level immigration and environmental emissions. *Ecological Economics* 69, 1170–1175.
50. Grossman G.M., & Krueger A.B. (1995). Economic growth and the environment". *Quarterly Journal of Economics* 110, 353–377.
51. Kuznets S. (1955). Economic growth and income inequality. *American Economic Review* 49, 1–28.
52. Common M. & Stagl S. (2008). *Introduction to Ecological Economics*, México, Editorial Reverté
53. Geng Y, Liu L., Chen L. (2023c). Rural revitalization of China: A new framework, measurement and forecast. *Socio-Economic Planning Sciences* 89: 101696.
